# Supplementary material
Source: PubMed Central journal article supplement (PMC2553615)
Supplement: tpc.108.059444_1.pdf [file tpc.108.059444_1.pdf]

Supplemental Data. Li et al. (2008). The *Arabidopsis* NFYA5 transcription factor is regulated transcriptionally and posttranscriptionally to promote drought resistance.

```

AT1G17590 VNAKQEHAI MRRRQ QAKLEAQN----KLIKARKPYLHESRHVHALR RPRGSGGRFLNTK
AT1G54160 VNAKQYHAILRRRKHRAKLEAQN----KLIKCRKPYLHESRHLHALR RARGSGGRFLNTK
AT1G72830 VNAKQYHAIMRRRQ QAKLEAQN----KLIKARKPYLHESRHVHALR RPRGSGGRFLNTK
AT2G34720 VNAKQYHGI LRRRQ SRAKLEARN----RAIKAKKPYMHESRHLHALR RPRGCGGRFLNTK
AT3G05690 VNAKQYHGI LRRRQ SRAKLEAVLDQKKLSRCRKPYMHESRHLHALR RPRGSGGRFLNTK
AT3G14020 VNAKQYQAILRRRERAKLEAQN----KLIKVRKPYLHESRHLHALR RVRGSGGRFLNTK
AT3G20910 VNAKQYQAILRRRQARAKAELEK----KLIKSRKPYLHESRHVHALR RPRGCGGRFAKKT
AT5G06510 VNAKQYHGI LRRRQ SRAKAEKLS----RCRKPYMHESRHLHALR RPRGSGGRFLNTK
AT5G12840 VNAKQYEGILRRRKA RAKAELEK----KVLTRDRKPYLHESRHVHALR RPRGSGGRFAKKS

```

NF-YC/NF-YB binding

Linker

DNA binding

**Supplemental Figure 1.** Sequence alignment of the conserved domains in *Arabidopsis* NFYA family members.

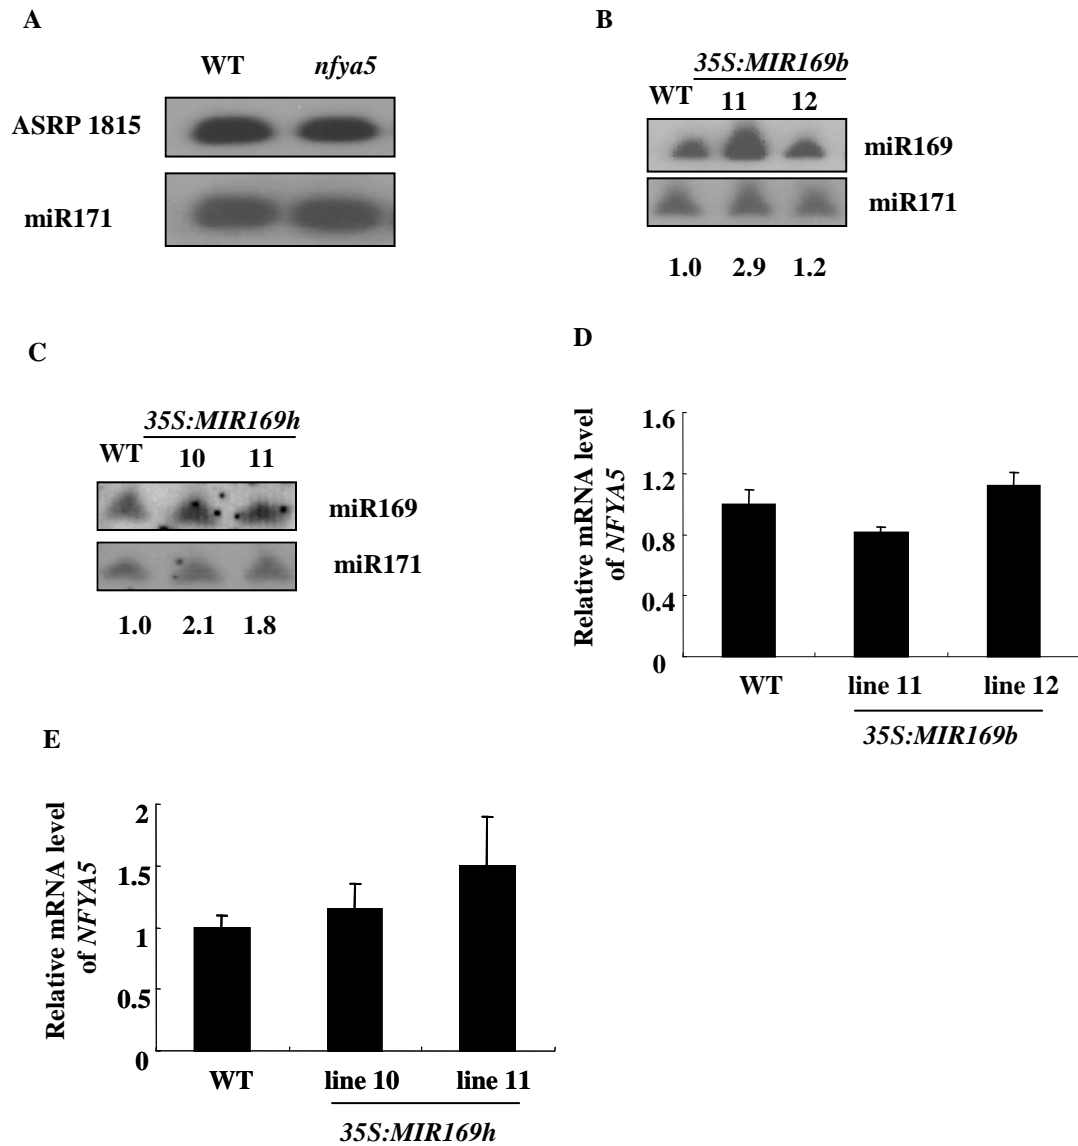

**Supplemental Figure 2.** Analysis of miR169 (A-C) and *NFYA5* mRNA (D and E) levels in *nfyA5*, *35S:MIR169b* and *35S:MIR169h* transgenic plant lines. Real-time RT-PCR quantification of *NFYA5* transcript levels was normalized to the expression of *Tub 8*. Error bars represent standard errors (n=3).

**A**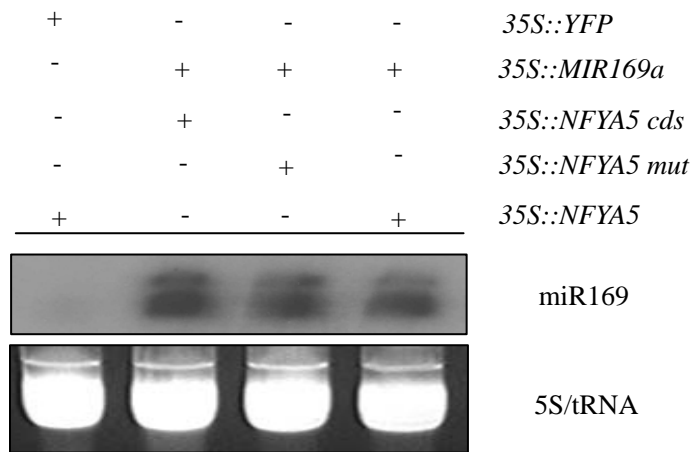**B**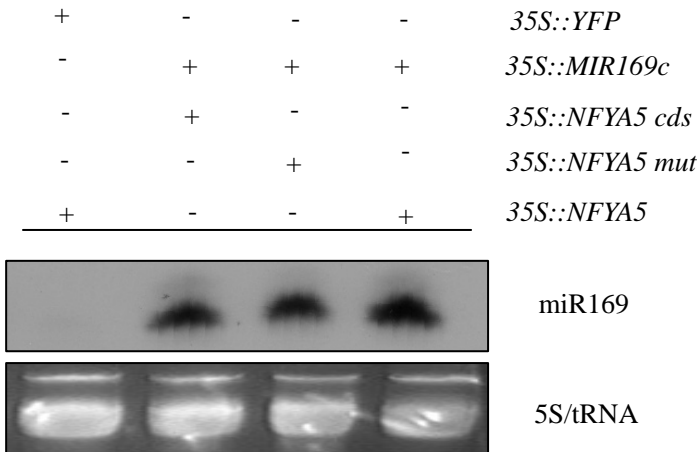

**Supplemental Figure 3.** Coexpression of various combinations of miR169 and *NFYA5* constructs in *N. benthamiana*. (A) Detection of miR169 in *N. benthamiana* coexpressing *MIR169a* and *NFYA5* constructs. (B) Detection of miR169 in *N. benthamiana* coexpressing *MIR169c* and *NFYA5* constructs.

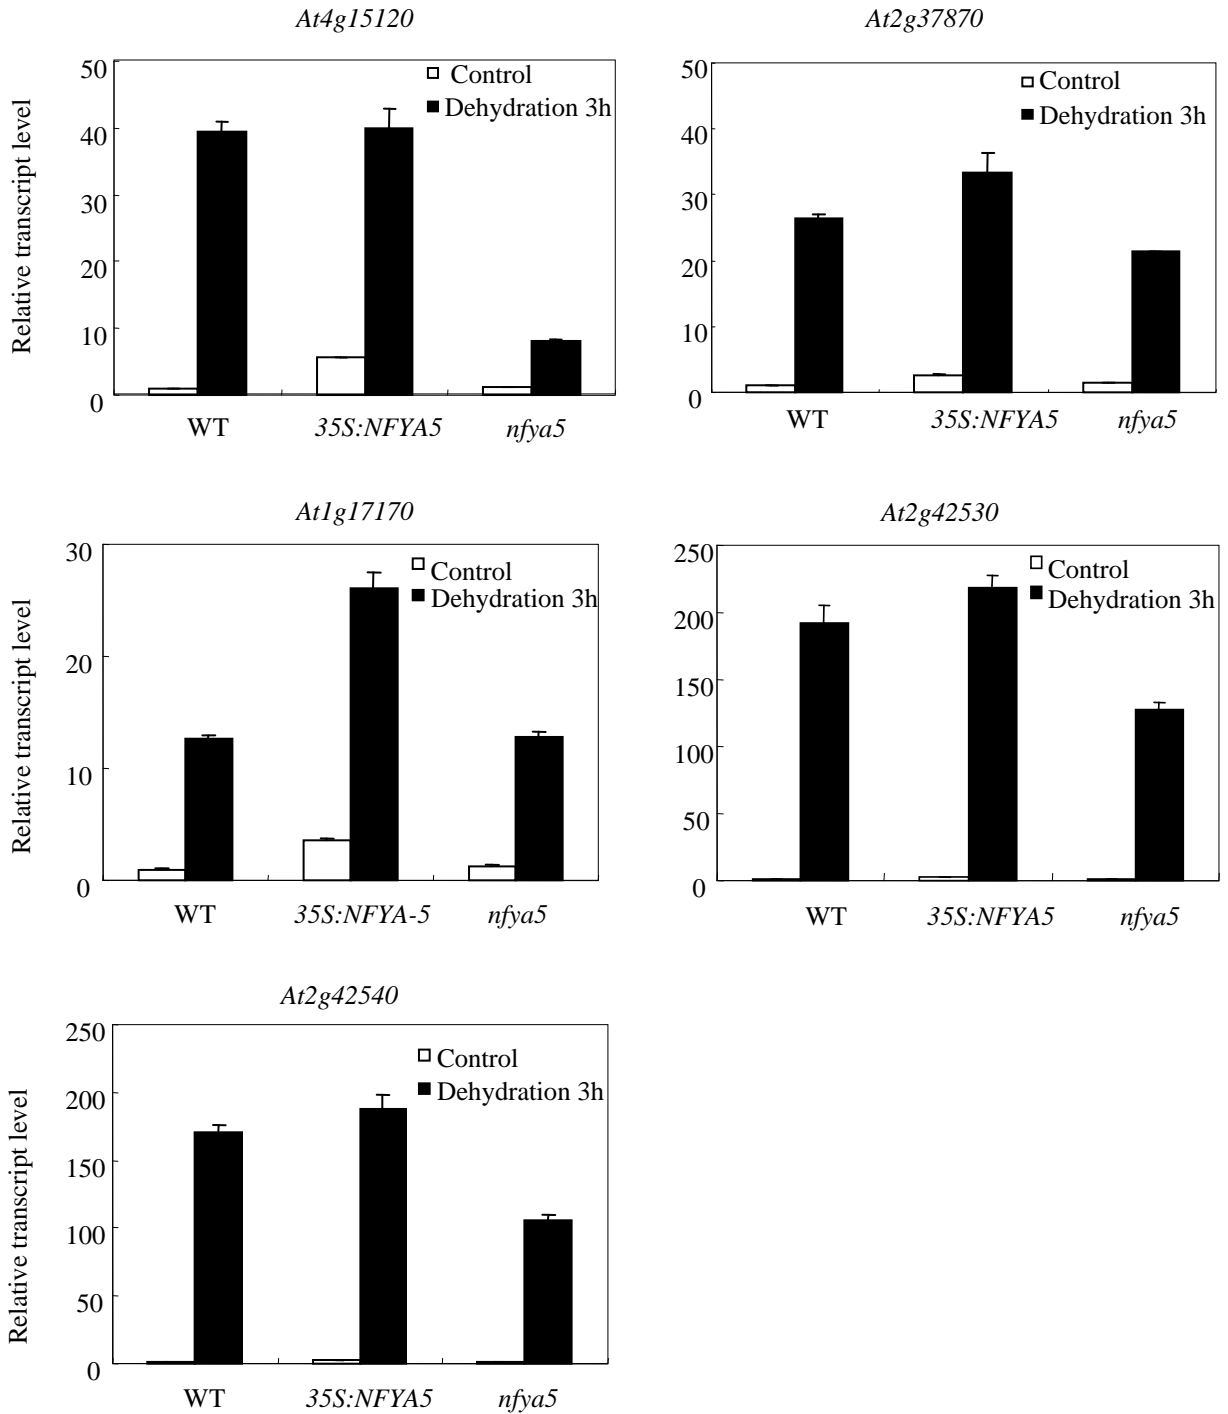

**Supplemental Figure 4.** Analysis of transcript levels in the wild-type and 35S:NFYA5 transgenic plants. Real-time RT-PCR was used for analyzing the expression levels (normalized to the expression of *Tub8*) of indicated loci. Error bars represent standard errors for three independent experiments.

**Supplemental Table S1.** List of genes with expression changes (pfp<0.05) in the 35S:*NFYA5* transgenic plants from microarray analysis.

**A. Genes with higher expression in *NFYA5* overexpression plants**

| Gene ID   | Affy ID   | Relative Expression Values<br>(log <sub>2</sub> ) |      |       |       | Definition                                                                                                                                                    |
|-----------|-----------|---------------------------------------------------|------|-------|-------|---------------------------------------------------------------------------------------------------------------------------------------------------------------|
|           |           | WT1                                               | WT2  | OX1   | OX2   |                                                                                                                                                               |
| AT1G17170 | 262518_at | 6.05                                              | 5.94 | 7.42  | 7.15  | [AT1G17170]ATGSTU24 (Arabidopsis thaliana Glutathione S-transferase (class tau) 24); glutathione transferase                                                  |
| AT1G17180 | 262517_at | 5.60                                              | 5.25 | 7.01  | 7.23  | [AT1G17180]ATGSTU25 (Arabidopsis thaliana Glutathione S-transferase (class tau) 25); glutathione transferase                                                  |
| AT1G26380 | 261021_at | 5.74                                              | 5.46 | 8.02  | 6.38  | [AT1G26380]FAD-binding domain-containing protein                                                                                                              |
| AT1G54160 | 263158_at | 5.71                                              | 5.87 | 8.54  | 10.38 | [AT1G54160]CCAAT-binding transcription factor (CBF-B/NF-YA) family protein                                                                                    |
| AT1G78340 | 260803_at | 5.78                                              | 5.84 | 6.73  | 6.82  | [AT1G78340]ATGSTU22 (Arabidopsis thaliana Glutathione S-transferase (class tau) 22); glutathione transferase                                                  |
| AT1G78370 | 260745_at | 9.39                                              | 9.25 | 10.21 | 10.19 | [AT1G78370]ATGSTU20 (Arabidopsis thaliana Glutathione S-transferase (class tau) 20); glutathione transferase                                                  |
| AT2G30750 | 267565_at | 4.71                                              | 4.70 | 6.77  | 5.89  | [AT2G30750]CYP71A12 (cytochrome P450, family 71, subfamily A, polypeptide 12); oxygen binding                                                                 |
| AT2G37870 | 266098_at | 7.18                                              | 7.00 | 8.59  | 8.57  | [AT2G37870]protease inhibitor/seed storage/lipid transfer protein (LTP) family protein                                                                        |
| AT2G40670 | 266078_at | 5.92                                              | 5.61 | 6.67  | 6.62  | [AT2G40670]ARR16 (response regulator 16); transcription regulator/ two-component response regulator                                                           |
| AT2G41480 | 267101_at | 5.81                                              | 5.76 | 6.92  | 7.03  | [AT2G41480]peroxidase                                                                                                                                         |
| AT2G42530 | 263495_at | 8.28                                              | 8.28 | 9.40  | 9.36  | [AT2G42530]cold-responsive protein / cold-regulated protein (cor15b)                                                                                          |
| AT2G42540 | 263497_at | 9.42                                              | 9.60 | 10.52 | 10.77 | [AT2G42540]COR15A (COLD-REGULATED 15A)                                                                                                                        |
| AT2G43570 | 260568_at | 6.05                                              | 5.94 | 8.06  | 6.87  | [AT2G43570]chitinase, putative                                                                                                                                |
| AT3G49580 | 252269_at | 6.06                                              | 5.60 | 6.81  | 6.80  | [AT3G49580]similar to unknown protein [Arabidopsis thaliana] (TAIR:AT3G49570.1); similar to unknown protein [Brassica rapa subsp. pekinensis] (GB:AAQ92331.1) |

|                     |             |      |      |       |       |                                                                                                                                                                                                                                                            |
|---------------------|-------------|------|------|-------|-------|------------------------------------------------------------------------------------------------------------------------------------------------------------------------------------------------------------------------------------------------------------|
| AT3G53400           | 251937_at   | 7.02 | 6.93 | 8.00  | 7.84  | [AT3G53400]similar to unknown protein [Arabidopsis thaliana] (TAIR:AT5G03190.1); similar to conserved hypothetical protein [Medicago truncatula] (GB:ABD32814.1); contains domain ARM repeat (SSF48371); contains domain no description (G3D.3.40.50.1860) |
| AT4G15210           | 245275_at   | 4.50 | 4.52 | 6.40  | 6.10  | [AT4G15210]ATBETA-AMY (BETA-AMYLASE); beta-amylase                                                                                                                                                                                                         |
| AT4G23600           | 254232_at   | 8.62 | 8.75 | 9.93  | 9.43  | [AT4G23600]CORI3 (CORONATINE INDUCED 1, JASMONIC ACID RESPONSIVE 2); transaminase                                                                                                                                                                          |
| AT5G38900           | 249481_at   | 4.89 | 4.89 | 6.60  | 5.50  | [AT5G38900]DSBA oxidoreductase family protein                                                                                                                                                                                                              |
| AT5G59310           | 247718_at   | 7.33 | 7.15 | 8.59  | 7.90  | [AT5G59310]LTP4 (LIPID TRANSFER PROTEIN 4); lipid binding                                                                                                                                                                                                  |
| AT5G59320           | 247717_at   | 8.73 | 8.42 | 9.55  | 9.44  | [AT5G59320]LTP3 (LIPID TRANSFER PROTEIN 3); lipid binding                                                                                                                                                                                                  |
| AT5G65080           | 247224_at   | 4.70 | 4.76 | 5.96  | 6.01  | [AT5G65080]MAF5 (MADS AFFECTING FLOWERING 5); transcription factor                                                                                                                                                                                         |
| ATCG00600           | 244966_at   | 6.17 | 7.28 | 8.22  | 8.70  | [ATCG00600]Cytochrome b6-f complex, subunit V. Disruption of homologous gene in Chlamydomonas results in disruption of cytochrome b6-f complex.                                                                                                            |
| ATCG00660           | 244970_at   | 6.63 | 6.76 | 7.69  | 7.55  | [ATCG00660]encodes a chloroplast ribosomal protein L20, a constituent of the large subunit of the ribosomal complex                                                                                                                                        |
| ATCG01000,ATCG01130 | 244993_s_at | 9.34 | 9.95 | 10.72 | 10.95 | [ATCG01000]hypothetical protein ,[ATCG01130]hypothetical protein                                                                                                                                                                                           |

## B. Genes with lower expression in *NFYA5* overexpression plants

| Gene ID             | Affy ID     | Relative Expression Values (log <sub>2</sub> ) |       |       |       | Definition                                                                      |
|---------------------|-------------|------------------------------------------------|-------|-------|-------|---------------------------------------------------------------------------------|
|                     |             | WT1                                            | WT2   | OX1   | OX2   |                                                                                 |
| AT1G05250,AT1G05240 | 264567_s_at | 8.36                                           | 8.40  | 7.30  | 7.65  | [AT1G05250]peroxidase, putative ,[AT1G05240]peroxidase, putative                |
| AT1G05260           | 264577_at   | 9.19                                           | 9.11  | 8.05  | 8.10  | [AT1G05260]RCI3 (RARE COLD INDUCIBLE GENE 3); peroxidase                        |
| AT1G10770           | 262760_at   | 7.39                                           | 7.06  | 6.36  | 6.68  | [AT1G10770]invertase/pectin methylesterase inhibitor family protein             |
| AT1G13300           | 259365_at   | 6.49                                           | 6.43  | 5.60  | 5.71  | [AT1G13300]myb family transcription factor                                      |
| AT1G13670           | 256097_at   | 8.06                                           | 7.96  | 7.32  | 7.35  | [AT1G13670]similar to unknown protein [Arabidopsis thaliana] (TAIR:AT1G69160.1) |
| AT1G19530           | 260668_at   | 12.05                                          | 12.09 | 11.49 | 11.24 | [AT1G19530]unknown protein                                                      |

|           |           |       |       |       |       |                                                                                                                                                                                                                                                                                                  |
|-----------|-----------|-------|-------|-------|-------|--------------------------------------------------------------------------------------------------------------------------------------------------------------------------------------------------------------------------------------------------------------------------------------------------|
| AT1G29090 | 260890_at | 6.00  | 5.51  | 5.08  | 4.74  | [AT1G29090]peptidase C1A papain family protein                                                                                                                                                                                                                                                   |
| AT1G29500 | 259773_at | 6.93  | 6.83  | 6.22  | 6.17  | [AT1G29500]auxin-responsive protein, putative                                                                                                                                                                                                                                                    |
| AT1G49860 | 259813_at | 6.89  | 6.84  | 5.93  | 6.42  | [AT1G49860]ATGSTF14 (Arabidopsis thaliana Glutathione S-transferase (class phi) 14); glutathione transferase                                                                                                                                                                                     |
| AT1G51830 | 246375_at | 6.75  | 6.75  | 5.43  | 6.04  | [AT1G51830]ATP binding / kinase/ protein serine/threonine kinase                                                                                                                                                                                                                                 |
| AT1G61590 | 265031_at | 7.12  | 6.83  | 6.30  | 6.27  | [AT1G61590]protein kinase, putative                                                                                                                                                                                                                                                              |
| AT1G64660 | 261957_at | 9.65  | 9.61  | 9.27  | 8.63  | [AT1G64660]ATMGL; catalytic/ methionine gamma-lyase                                                                                                                                                                                                                                              |
| AT1G69490 | 256300_at | 10.05 | 10.02 | 9.38  | 9.06  | [AT1G69490]NAP (NAC-LIKE, ACTIVATED BY AP3/PI); transcription factor                                                                                                                                                                                                                             |
| AT1G70850 | 262260_at | 10.73 | 10.87 | 9.82  | 10.04 | [AT1G70850]Bet v I allergen family protein                                                                                                                                                                                                                                                       |
| AT1G73330 | 245736_at | 11.27 | 11.46 | 10.70 | 10.62 | [AT1G73330]ATDR4 (Arabidopsis thaliana drought-repressed 4)                                                                                                                                                                                                                                      |
| AT1G76410 | 259982_at | 9.16  | 9.18  | 8.78  | 8.19  | [AT1G76410]ATL8; protein binding / zinc ion binding                                                                                                                                                                                                                                              |
| AT1G78290 | 260774_at | 8.46  | 8.28  | 7.57  | 7.41  | [AT1G78290]serine/threonine protein kinase, putative                                                                                                                                                                                                                                             |
| AT1G79360 | 264124_at | 7.54  | 7.68  | 7.18  | 6.67  | [AT1G79360]transporter-related                                                                                                                                                                                                                                                                   |
| AT1G79840 | 260166_at | 7.67  | 7.47  | 6.52  | 7.00  | [AT1G79840]GL2 (GLABRA 2); DNA binding / transcription factor                                                                                                                                                                                                                                    |
| AT1G80160 | 262047_at | 8.73  | 8.76  | 8.17  | 7.80  | [AT1G80160]lactoylglutathione lyase family protein / glyoxalase I family protein                                                                                                                                                                                                                 |
| AT1G80240 | 262045_at | 7.94  | 7.85  | 6.80  | 7.00  | [AT1G80240]similar to unknown protein [Arabidopsis thaliana] (TAIR:AT5G25460.1); similar to unknown [Ricinus communis] (GB:CAB02653.1); contains InterPro domain Galactose-binding like; (InterPro:IPR008979); contains InterPro domain Protein of unknown function DUF642; (InterPro:IPR006946) |
| AT2G01520 | 266353_at | 10.53 | 10.75 | 9.48  | 9.56  | [AT2G01520]major latex protein-related / MLP-related                                                                                                                                                                                                                                             |
| AT2G01530 | 266330_at | 11.06 | 11.12 | 10.16 | 10.35 | [AT2G01530]major latex protein-related / MLP-related                                                                                                                                                                                                                                             |
| AT2G01900 | 263596_at | 5.12  | 4.89  | 4.26  | 4.39  | [AT2G01900]endonuclease/exonuclease/phosphatase family protein                                                                                                                                                                                                                                   |
| AT2G14580 | 266383_at | 6.59  | 6.19  | 5.76  | 5.64  | [AT2G14580]ATPRB1 (Arabidopsis thaliana basic pathogenesis-related protein 1)                                                                                                                                                                                                                    |
| AT2G17880 | 264788_at | 9.52  | 9.54  | 8.82  | 8.94  | [AT2G17880]DNAJ heat shock protein, putative                                                                                                                                                                                                                                                     |
| AT2G21540 | 263765_at | 7.19  | 7.04  | 6.33  | 6.50  | [AT2G21540]SEC14 cytosolic factor, putative / phosphoglyceride transfer protein, putative                                                                                                                                                                                                        |
| AT2G22860 | 266799_at | 9.31  | 9.34  | 8.71  | 8.50  | [AT2G22860]ATPSK2 (PHYTOSULFOKINE 2 PRECURSOR); growth factor                                                                                                                                                                                                                                    |

|                     |             |       |       |      |      |                                                                                                                                                                                                                                            |
|---------------------|-------------|-------|-------|------|------|--------------------------------------------------------------------------------------------------------------------------------------------------------------------------------------------------------------------------------------------|
| AT2G31980           | 265672_at   | 6.50  | 6.22  | 5.65 | 5.73 | [AT2G31980]cysteine proteinase inhibitor-related                                                                                                                                                                                           |
| AT2G32300           | 266356_at   | 6.14  | 6.25  | 5.37 | 5.63 | [AT2G32300]UCC1 (UCLACYANIN 1); copper ion binding                                                                                                                                                                                         |
| AT2G33815,AT2G33810 | 267460_at   | 7.37  | 6.85  | 6.13 | 6.05 | [AT2G33815]other RNA ,[AT2G33810]SPL3 (SQUAMOSA PROMOTER BINDING PROTEIN-LIKE 3); transcription factor                                                                                                                                     |
| AT2G34180           | 267045_at   | 7.04  | 6.86  | 6.56 | 6.00 | [AT2G34180]CIPK13 (CIPK13); kinase                                                                                                                                                                                                         |
| AT2G34390,AT2G29870 | 267024_s_at | 9.27  | 9.22  | 8.05 | 8.53 | [AT2G34390]NIP2;1/NLM4 (NOD26-LIKE INTRINSIC PROTEIN 2;1); water channel ,[AT2G29870]major intrinsic family protein / MIP family protein                                                                                                   |
| AT2G35270           | 266546_at   | 8.01  | 7.84  | 7.07 | 7.37 | [AT2G35270]DNA-binding protein-related                                                                                                                                                                                                     |
| AT2G35710           | 265841_at   | 6.65  | 6.72  | 5.82 | 5.99 | [AT2G35710]glycogenin glucosyltransferase (glycogenin)-related                                                                                                                                                                             |
| AT2G37750           | 267178_at   | 10.31 | 10.34 | 9.48 | 9.52 | [AT2G37750]unknown protein                                                                                                                                                                                                                 |
| AT2G41260           | 266393_at   | 4.48  | 3.99  | 3.51 | 3.37 | [AT2G41260]M17                                                                                                                                                                                                                             |
| AT2G44380           | 267385_at   | 9.53  | 9.44  | 8.65 | 8.85 | [AT2G44380]DC1 domain-containing protein                                                                                                                                                                                                   |
| AT2G45220           | 245148_at   | 9.54  | 9.53  | 9.13 | 8.48 | [AT2G45220]pectinesterase family protein                                                                                                                                                                                                   |
| AT2G46740           | 266711_at   | 7.98  | 7.86  | 7.02 | 6.99 | [AT2G46740]FAD-binding domain-containing protein                                                                                                                                                                                           |
| AT3G02620,AT3G02610 | 258473_s_at | 6.90  | 6.71  | 5.50 | 5.81 | [AT3G02620]acyl-(acyl-carrier-protein) desaturase, putative / stearyl-ACP desaturase, putative ,[AT3G02610]acyl-[acyl-carrier-protein] desaturase                                                                                          |
| AT3G09220           | 259036_at   | 8.62  | 8.84  | 7.92 | 7.90 | [AT3G09220]LAC7 (laccase 7); copper ion binding / oxidoreductase                                                                                                                                                                           |
| AT3G11370           | 259260_at   | 4.94  | 4.99  | 4.16 | 4.32 | [AT3G11370]DC1 domain-containing protein                                                                                                                                                                                                   |
| AT3G13700,AT3G13710 | 256771_at   | 7.85  | 7.92  | 7.03 | 7.15 | [AT3G13700]RNA-binding protein, putative ,[AT3G13710]prenylated rab acceptor (PRA1) family protein                                                                                                                                         |
| AT3G14770           | 256548_at   | 9.22  | 9.28  | 8.57 | 8.43 | [AT3G14770]nodulin MtN3 family protein                                                                                                                                                                                                     |
| AT3G15440           | 258383_at   | 7.54  | 7.69  | 6.87 | 6.98 | [AT3G15440]similar to zinc finger (C3HC4-type RING finger) family protein [Arabidopsis thaliana] (TAIR:AT3G15740.1)                                                                                                                        |
| AT3G16150           | 258338_at   | 10.03 | 10.03 | 9.22 | 8.63 | [AT3G16150]L-asparaginase, putative / L-asparagine amidohydrolase, putative                                                                                                                                                                |
| AT3G18170           | 258143_at   | 6.54  | 6.02  | 5.31 | 5.82 | [AT3G18170]similar to unknown protein [Arabidopsis thaliana] (TAIR:AT3G18180.1); similar to glycosyltransferase [Saccharum officinarum] (GB:CAI30073.1); contains InterPro domain Protein of unknown function DUF563; (InterPro:IPR007657) |
| AT3G20210           | 257130_at   | 4.72  | 4.77  | 3.87 | 3.91 | [AT3G20210]DELTA-VPE (delta vacuolar processing enzyme); cysteine-type endopeptidase                                                                                                                                                       |



|           |           |       |       |       |       |                                                                                                                                                                                                                                                           |
|-----------|-----------|-------|-------|-------|-------|-----------------------------------------------------------------------------------------------------------------------------------------------------------------------------------------------------------------------------------------------------------|
| AT3G21370 | 256814_at | 5.48  | 5.35  | 4.78  | 4.70  | [AT3G21370]glycosyl hydrolase family 1 protein                                                                                                                                                                                                            |
| AT3G21720 | 257947_at | 6.89  | 6.72  | 6.08  | 5.71  | [AT3G21720]isocitrate lyase, putative                                                                                                                                                                                                                     |
| AT3G45730 | 252539_at | 8.93  | 8.82  | 8.18  | 7.90  | [AT3G45730]unknown protein                                                                                                                                                                                                                                |
| AT3G46270 | 252510_at | 5.38  | 5.21  | 4.19  | 4.42  | [AT3G46270]receptor protein kinase-related                                                                                                                                                                                                                |
| AT3G48580 | 252320_at | 5.99  | 6.32  | 5.29  | 5.24  | [AT3G48580]xyloglucan:xyloglucosyl transferase, putative / xyloglucan endotransglycosylase, putative / endo-xyloglucan transferase, putative                                                                                                              |
| AT3G49160 | 252300_at | 5.68  | 6.07  | 5.42  | 5.01  | [AT3G49160]pyruvate kinase family protein                                                                                                                                                                                                                 |
| AT3G50970 | 252102_at | 12.17 | 12.09 | 11.47 | 11.34 | [AT3G50970]LTI30/XERO2 (LOW TEMPERATURE-INDUCED 30)                                                                                                                                                                                                       |
| AT3G53250 | 251977_at | 5.57  | 5.05  | 4.42  | 4.66  | [AT3G53250]auxin-responsive family protein                                                                                                                                                                                                                |
| AT3G59900 | 251436_at | 7.04  | 6.92  | 5.89  | 6.42  | [AT3G59900](ARGOS); unknown protein                                                                                                                                                                                                                       |
| AT3G62680 | 251226_at | 6.33  | 6.37  | 5.35  | 5.23  | [AT3G62680]PRP3 (PROLINE-RICH PROTEIN 3); structural constituent of cell wall                                                                                                                                                                             |
| AT4G00680 | 255632_at | 6.58  | 6.27  | 5.34  | 5.83  | [AT4G00680]actin-depolymerizing factor, putative                                                                                                                                                                                                          |
| AT4G01140 | 255608_at | 5.74  | 5.69  | 4.99  | 4.86  | [AT4G01140]similar to unknown protein [Arabidopsis thaliana] (TAIR:AT3G08600.1); similar to Protein of unknown function DUF1191 [Medicago truncatula] (GB:ABE88654.1); contains InterPro domain Protein of unknown function DUF1191; (InterPro:IPR010605) |
| AT4G02270 | 255516_at | 8.54  | 8.63  | 7.50  | 7.93  | [AT4G02270]pollen Ole e 1 allergen and extensin family protein                                                                                                                                                                                            |
| AT4G04990 | 255252_at | 6.11  | 6.05  | 5.37  | 5.42  | [AT4G04990]similar to unknown protein [Arabidopsis thaliana] (TAIR:AT1G61260.1); similar to fiber expressed protein [Gossypium hirsutum] (GB:AAY85179.1); contains InterPro domain Protein of unknown function DUF761, plant; (InterPro:IPR008480)        |
| AT4G08300 | 255127_at | 6.90  | 6.68  | 6.03  | 6.21  | [AT4G08300]nodulin MtN21 family protein                                                                                                                                                                                                                   |
| AT4G12550 | 254828_at | 10.78 | 10.91 | 9.53  | 10.03 | [AT4G12550]AIR1 (Auxin-Induced in Root cultures 1); lipid binding                                                                                                                                                                                         |
| AT4G14060 | 245267_at | 5.34  | 5.40  | 4.87  | 4.51  | [AT4G14060]major latex protein-related / MLP-related                                                                                                                                                                                                      |
| AT4G14130 | 245325_at | 10.28 | 10.31 | 9.71  | 9.39  | [AT4G14130]XTR7 (XYLOGLUCAN ENDOTRANSGLYCOSYLASE 7); hydrolase, acting on glycosyl bonds                                                                                                                                                                  |
| AT4G18510 | 254644_at | 7.77  | 7.80  | 6.62  | 6.43  | [AT4G18510]CLE2 (CLAVATA3/ESR-RELATED); receptor binding                                                                                                                                                                                                  |
| AT4G25820 | 254044_at | 7.73  | 7.29  | 6.17  | 6.61  | [AT4G25820]XTR9 (XYLOGLUCAN ENDOTRANSGLYCOSYLASE 9); hydrolase, acting on glycosyl bonds                                                                                                                                                                  |
| AT4G26010 | 253998_at | 8.89  | 8.78  | 7.70  | 8.08  | [AT4G26010]peroxidase, putative                                                                                                                                                                                                                           |
| AT4G26260 | 254001_at | 8.97  | 9.10  | 8.41  | 8.06  | [AT4G26260]MIOX4 (MYO-INOSITOL OXYGENASE 4)                                                                                                                                                                                                               |

|           |           |       |       |       |       |                                                                                                                                                                                                                                                                                                                                                                                                                                              |
|-----------|-----------|-------|-------|-------|-------|----------------------------------------------------------------------------------------------------------------------------------------------------------------------------------------------------------------------------------------------------------------------------------------------------------------------------------------------------------------------------------------------------------------------------------------------|
| AT4G27260 | 253908_at | 8.23  | 8.45  | 7.67  | 7.62  | [AT4G27260]GH3.5/WES1; indole-3-acetic acid amido synthetase                                                                                                                                                                                                                                                                                                                                                                                 |
| AT4G28520 | 253767_at | 5.67  | 5.50  | 4.41  | 4.22  | [AT4G28520]CRU3 (CRUCIFERIN 3); nutrient reservoir                                                                                                                                                                                                                                                                                                                                                                                           |
| AT4G28530 | 253774_at | 5.67  | 5.90  | 4.81  | 5.35  | [AT4G28530]ANAC074 (Arabidopsis NAC domain containing protein 74); transcription factor                                                                                                                                                                                                                                                                                                                                                      |
| AT4G30670 | 253582_at | 7.90  | 8.11  | 6.94  | 7.32  | [AT4G30670]unknown protein                                                                                                                                                                                                                                                                                                                                                                                                                   |
| AT4G32280 | 253423_at | 6.21  | 5.78  | 5.33  | 5.33  | [AT4G32280]IAA29 (indoleacetic acid-induced protein 29); transcription factor                                                                                                                                                                                                                                                                                                                                                                |
| AT4G37220 | 246251_at | 7.93  | 7.73  | 7.05  | 6.82  | [AT4G37220]stress-responsive protein, putative                                                                                                                                                                                                                                                                                                                                                                                               |
| AT4G39675 | 252882_at | 11.34 | 11.35 | 10.72 | 10.49 | [AT4G39675]unknown protein                                                                                                                                                                                                                                                                                                                                                                                                                   |
| AT4G40090 | 252833_at | 5.88  | 5.83  | 5.02  | 5.27  | [AT4G40090]AGP3 (ARABINOGALACTAN-PROTEIN 3)                                                                                                                                                                                                                                                                                                                                                                                                  |
| AT5G02540 | 251013_at | 7.74  | 7.75  | 6.56  | 7.19  | [AT5G02540]short-chain dehydrogenase/reductase (SDR) family protein                                                                                                                                                                                                                                                                                                                                                                          |
| AT5G02580 | 251012_at | 5.88  | 5.57  | 5.04  | 5.02  | [AT5G02580]similar to unknown protein [Arabidopsis thaliana] (TAIR:AT3G55240.1); similar to Os03g0280400 [Oryza sativa (japonica cultivar-group)] (GB:NP_001049737.1); similar to Os05g0462000 [Oryza sativa (japonica cultivar-group)] (GB:NP_001055765.1); similar to Os01g0837600 [Oryza sativa (japonica cultivar-group)] (GB:NP_001044739.1); contains InterPro domain Conserved hypothetical protein 1589, plant; (InterPro:IPR006476) |
| AT5G04340 | 245711_at | 8.32  | 8.28  | 7.77  | 7.49  | [AT5G04340]C2H2; nucleic acid binding / transcription factor/ zinc ion binding                                                                                                                                                                                                                                                                                                                                                               |
| AT5G04960 | 250801_at | 5.72  | 5.46  | 4.75  | 5.09  | [AT5G04960]pectinesterase family protein                                                                                                                                                                                                                                                                                                                                                                                                     |
| AT5G05500 | 250778_at | 7.82  | 7.90  | 6.96  | 7.31  | [AT5G05500]pollen Ole e 1 allergen and extensin family protein                                                                                                                                                                                                                                                                                                                                                                               |
| AT5G10040 | 250464_at | 8.86  | 8.62  | 8.41  | 7.37  | [AT5G10040]similar to unknown protein [Arabidopsis thaliana] (TAIR:AT5G65207.1); similar to 80A08_3 [Brassica rapa subsp. pekinensis] (GB:AAZ67588.1)                                                                                                                                                                                                                                                                                        |
| AT5G12050 | 250327_at | 8.62  | 8.71  | 7.68  | 8.23  | [AT5G12050]similar to unknown protein [Arabidopsis thaliana] (TAIR:AT1G54200.1); similar to Os03g0175800 [Oryza sativa (japonica cultivar-group)] (GB:NP_001049135.1); similar to ATP-dependent DNA helicase, putative [Plasmodium falciparum 3D7] (GB:NP_702167.1)                                                                                                                                                                          |
| AT5G19890 | 246149_at | 6.56  | 6.64  | 6.19  | 5.66  | [AT5G19890]peroxidase, putative                                                                                                                                                                                                                                                                                                                                                                                                              |
| AT5G23220 | 249848_at | 6.52  | 6.60  | 5.85  | 5.54  | [AT5G23220]isochorismatase hydrolase family protein                                                                                                                                                                                                                                                                                                                                                                                          |

|           |           |      |      |      |      |                                                                                                                                                                              |
|-----------|-----------|------|------|------|------|------------------------------------------------------------------------------------------------------------------------------------------------------------------------------|
| AT5G24410 | 249729_at | 6.96 | 6.82 | 6.15 | 6.07 | [AT5G24410]glucosamine/galactosamine-6-phosphate isomerase-related                                                                                                           |
| AT5G25110 | 246922_at | 8.28 | 8.05 | 7.14 | 7.40 | [AT5G25110]CIPK25 (CBL-INTERACTING PROTEIN KINASE 25); kinase                                                                                                                |
| AT5G39520 | 249454_at | 5.89 | 5.73 | 5.27 | 5.00 | [AT5G39520]similar to unknown protein [Arabidopsis thaliana] (TAIR:AT5G39530.1); similar to hypothetical protein MtrDRAFT_AC119412g1v1 [Medicago truncatula] (GB:ABE86761.1) |
| AT5G43520 | 249097_at | 9.51 | 9.54 | 8.45 | 8.93 | [AT5G43520]DC1 domain-containing protein                                                                                                                                     |
| AT5G44120 | 249082_at | 7.32 | 7.33 | 4.34 | 3.83 | [AT5G44120]CRA1 (CRUCIFERINA); nutrient reservoir                                                                                                                            |
| AT5G44260 | 249065_at | 9.22 | 9.14 | 8.26 | 8.57 | [AT5G44260]zinc finger (CCCH-type) family protein                                                                                                                            |
| AT5G44610 | 249009_at | 8.79 | 8.49 | 7.89 | 8.08 | [AT5G44610]DREPP plasma membrane polypeptide-related                                                                                                                         |
| AT5G47950 | 248723_at | 6.70 | 6.86 | 5.72 | 6.16 | [AT5G47950]transferase family protein                                                                                                                                        |
| AT5G52050 | 248392_at | 6.97 | 6.72 | 6.25 | 5.69 | [AT5G52050]MATE efflux protein-related                                                                                                                                       |
| AT5G53980 | 248208_at | 5.47 | 5.45 | 4.69 | 4.83 | [AT5G53980]ATHB52 (ARABIDOPSIS THALIANA HOMEBOX PROTEIN 52); transcription factor                                                                                            |
| AT5G57530 | 247871_at | 5.59 | 5.39 | 4.35 | 4.87 | [AT5G57530]xyloglucan:xyloglucosyl transferase, putative / xyloglucan endotransglycosylase, putative / endo-xyloglucan transferase, putative                                 |
| AT5G57760 | 247878_at | 8.55 | 8.41 | 7.06 | 7.98 | [AT5G57760]contains InterPro domain Helix-loop-helix DNA-binding; (InterPro:IPR011598)                                                                                       |
| AT5G58750 | 247778_at | 5.47 | 5.03 | 4.52 | 4.66 | [AT5G58750]wound-responsive protein-related                                                                                                                                  |
| AT5G62860 | 247394_at | 7.81 | 7.81 | 7.14 | 7.17 | [AT5G62860]F-box family protein-related                                                                                                                                      |
| AT5G67400 | 246991_at | 8.34 | 8.29 | 7.45 | 7.55 | [AT5G67400]peroxidase 73 (PER73) (P73) (PRXR11)                                                                                                                              |
| no_match  | 248636_at | 6.60 | 6.50 | 5.64 | 5.64 | [no_match]                                                                                                                                                                   |
| no_match  | 261297_at | 5.63 | 5.68 | 4.86 | 5.04 | [no_match]                                                                                                                                                                   |

**Supplemental Table 2. List of primers used in this study**

| Primer Name           | Sequence (5'-3')          |
|-----------------------|---------------------------|
| miR169a Forward       | TGGGTATAGCTAGTGAAACGCG    |
| miR169a Reverse       | CCTTAGCTTGAGTTCTTGCGA     |
| miR169b Forward       | CTCCACTCCCTAAACCATCACAAC  |
| miR169b Reverse       | CTCATAACGGTCGATGTTAATCCGT |
| miR169c Forward       | CTACATTCACAAACGAGAGAATT   |
| miR169c Reverse       | GCTCTACTTTAGCATCTCAACCA   |
| miR169h Forward       | GTAGTCTTGTGGGATACTCATCA   |
| miR169h Reverse       | ATCCCCAAATTTGGAGGCCAAACA  |
| miR169i Forward       | AAGGTGTCTCTGGGTTGAAAAT    |
| miR169i Reverse       | CCATGATCATTTCATGTGCGTGCCT |
| miR169j Forward       | GAGAGCACATCCATGTGAGGAA    |
| miR169j Reverse       | GTCAGGCAAGTCATCCTTGGCT    |
| miR169k Forward       | CTCTTTGGCTATCTTGACATGCT   |
| miR169k Reverse       | CCAAGGAGACTGCCTGATGTCT    |
| miR169l Forward       | GAGAGCACATGAATGTAAGGCA    |
| miR169l Reverse       | AATAATGTGTAGACTCAGCCACAT  |
| miR169l Reverse       | CTTGCGGGTTAGGTTTCAGGCA    |
| miR169m Reverse       | GCCTCGAAATCATGAACATTATCT  |
| miR169n Forward       | AGAGAGCACATGCATGTATGGA    |
| miR169n Reverse       | GAAAAGTAGGTATAACATGGATGG  |
| NFYA5 Forward         | GAAGATTCATCTTGGGGAAACTC   |
| NFYA5 Reverse         | GAGCAGGAAACACAGAGTCTTGA   |
| At4g15120 Forward     | GGTTGGGTGTTTCCCGGCATCGGA  |
| At4g15120 Reverse     | GGCTTCTCCTAAGATCTGATCTCCA |
| At1g17170 Forward     | CCTTCCCTCCGATCCTTACAAGA   |
| At1g17170 Reverse     | CAACCCAAGTTTCTTCTACGTTTCG |
| At2g37870 Forward     | CGTTGAGGCGGCAGGTGAGTGT    |
| At2g37870 Reverse     | TGTAACGTCCACATCGCTTGCCA   |
| At2g42530 Forward     | TCAGTGGCATGGGTTCTTCTTCCA  |
| At2g42530 Reverse     | GAGGTCATCGAGGATGTTGCCGT   |
| At2g42540 Forward     | GTTCTCACTGGTATGGCTTCTT    |
| At2g42540 Reverse     | GTCTTTCGCTTCTCACCATCTGCT  |
| 18S Forward (tobacco) | AGGAATTGACGGAAGGGCA       |
| 18S Reverse (tobacco) | GTGCGGCCCCAGAACATCTAAG    |
| Tub8 Forward          | ATAACCGTTTCAAATCTCTCTCTC  |

Tub8 Reverse

TGCAAATCGTTCTCTCCTTG

---
